# Supplementary material for: Stratified Whole Genome Linkage Analysis of Chiari Type I Malformation Implicates Known Klippel-Feil Syndrome Genes as Putative Disease Candidates
Source: PLoS One. 2013 Apr 19;8(4):e61521. doi: 10.1371/journal.pone.0061521 (PMC3631233; doi:10.1371/journal.pone.0061521)
Supplement: Table S5 — GDF6 and GDF3 identified sequence variants. (DOC) [file pone.0061521.s007.doc]

**Table S5** GDF6 and GDF3 identified sequence variants

| **Gene** | **Chr** | **Locationa** | **Variant ID** | **Allelesb** | **Variant class** | **CMI / 1KG MAFc** | **Follow-upd** | **All affectedse,f** | **Reduced penetrancef** |
| --- | --- | --- | --- | --- | --- | --- | --- | --- | --- |
| GDF6 | 8 | 97154593 | NA | T/G | 3' UTR | 0.005 / NA | Yes | No (1/2) | Yes (1/2) |
| GDF6 | 8 | 97154790 | rs36028712 | T/C | 3' UTR | 0.063 / 0.066 | No |  |  |
| GDF6 | 8 | 97154813 | rs112542818 | C/T | 3' UTR | 0.026 / 0.003 | Yes | No (5/8) | Yes (2/4) |
| GDF6 | 8 | 97155360-97155362 | rs139734303 | CCT/C | 3' UTR | 0.010 / 0.02 | No |  |  |
| GDF6 | 8 | 97155701 | rs80085212 | C/G | 3' UTR | 0.010 / 0.017 | No |  |  |
| GDF6 | 8 | 97155707 | rs77181285 | G/T | 3' UTR | 0.010 / 0.017 | No |  |  |
| GDF6 | 8 | 97155793 | rs114201878 | C/G | 3' UTR | 0.010 / 0.017 | No |  |  |
| GDF6 | 8 | 97156214 | rs75587676 | T/A | 3' UTR | 0.010 / 0.017 | No |  |  |
| GDF6 | 8 | 97156411 | rs2440199 | T/C | 3' UTR | 0.599 / 0.414 | No |  |  |
| GDF6 | 8 | 97156472 | rs79053711 | T/G | 3' UTR | 0.005 / 0.02 | No |  |  |
| GDF6 | 8 | 97157223 | rs148861809 | C/G | Coding-syn | 0.036 / 0.028 | Yes | No (7/10) | Yes (3/8) |
| GDF6 | 8 | 97157413 | rs121909352 | G/T | Missense | 0.016 / 0.003g | Yes | No (4/6)h | Unknown (0/3) |
| GDF6 | 8 | 97157791 | rs77859767 | G/C | Intronic | 0.005 / NA | No |  |  |
| GDF6 | 8 | 97157792 | rs11783820 | G/C | Intronic | 0.010 / 0.053 | No |  |  |
| GDF6 | 8 | 97157811 | NA | T/A | Intronic | 0.005 / NA | Yes | No (1/2) | Yes (1/2) |
| GDF6 | 8 | 97158024-97158030 | NA | C/CGGCGGC | Intronic | 0.005 / NA | No |  |  |
| GDF6 | 8 | 97159015 | NA | A/G | Intronic | 0.005 / NA | No |  |  |
| GDF6 | 8 | 97159446-97159447 | NA | T/TA | Intronic | 0.005 / NA | No |  |  |
| GDF6 | 8 | 97159651 | rs76595269 | C/T | Intronic | 0.099 / 0.123 | No |  |  |
| GDF6 | 8 | 97169735 | NA | C/T | Intronic | 0.010 / NA | Yes | Yes (2/2) | Yes (1/2) |
| GDF6 | 8 | 97169759 | rs116719470 | C/T | Intronic | 0.021 / 0.049 | No |  |  |
| GDF6 | 8 | 97169811 | rs7845829 | G/C | Intronic | 0.089 / 0.09 | No |  |  |
| GDF6 | 8 | 97170374 | rs140757891 | C/T | Intronic | 0.021 / 0.013 | Yes | Yes (4/4) | Yes (2/10) |
| GDF6 | 8 | 97172403 | rs2466129 | A/G | Intronic | 0.495 / 0.474 | No |  |  |
| GDF6 | 8 | 97172487 | rs62516290 | G/T | Intronic | 0.078 / 0.077 | No |  |  |
| GDF3 | 12 | 7842587 | rs2302516 | C/G | Missense | 0.047 / 0.024 | Yes | No (7/11) | Yes (1/14) |
| GDF3 | 12 | 7842932 | rs12819884 | C/T | Missense | 0.353 / 0.339 | No |  |  |
| GDF3 | 12 | 7848202 | rs17727707 | G/C | Coding-syn | 0.067 / 0.075 | No |  |  |

aBase pair positions based on human genome build GRCh37/hg19

bAlleles: Reference allele / Alternate allele

cCMI MAF estimate based on all affected family members initially screened; 1KG MAF: Based on 1000 Genomes Integrated Phase 1 Release v3: European population

dVariant was validated by bidirectional sequencing and all sampled affected and unaffected individuals within each identified family were sequenced

eIs sharing observed across all affected individuals within each family?

fNumbers in parentheses: Numerator: number of sampled individuals carrying the variant, Denominator: total number of sampled individuals

gMAF estimate was not available from 1000 Genomes; MAF estimate based on the Exome sequencing project: European population

hIndividual diagnosed with Chiari Malformation Type 0 is counted as "affected" for the purposes of this table

Abbreviations: Chr: Chromosome; Coding-syn: Coding-synonymous; MAF: Minor allele frequency
